# Supplementary material for: Petroselinic acid purification and its use for the fermentation of new sophorolipids
Source: PubMed Central journal article supplement (PMC4816958; doi:10.1186/s13568-016-0199-7), 2016-03-31
Supplement: 13568_2016_199_MOESM1_ESM.pdf [file 13568_2016_199_MOESM1_ESM.pdf]

# AMB Express

## Electronic Supporting Information

### **Petroselinic acid purification and its use for the fermentation of new sophorolipids**

Elisabeth I.P. Delbeke<sup>a</sup>, Jonas Everaert<sup>a,b</sup>, Evelien Uitterhaegen<sup>a,c</sup>, Stijn Verweire<sup>b</sup>, Arno Verlee<sup>a</sup>, Thierry Talou<sup>c</sup>, Wim Soetaert<sup>b</sup>, Inge N.A. Van Bogaert<sup>b</sup> and Christian V. Stevens<sup>a\*</sup>

<sup>a</sup> SynBioC, Department of Sustainable Organic Chemistry and Technology, Ghent University, Coupure Links 653, 9000 Ghent, Belgium.

<sup>b</sup> InBio, Department of Biochemical and Microbial Technology, Ghent University, Coupure Links 653, 9000 Ghent, Belgium

<sup>c</sup> Laboratoire de Chimie Agro-industrielle, ENSIACET, Université de Toulouse, INP, 4 Allée Emile Monso, BP 44362, 31030 Toulouse Cedex 4, France.

Elisabeth.Delbeke@UGent.be, Jonas.Everaert@UGent.be, Evelien.Uitterhaegen@ensiacet.fr,  
Stijn.Verweire@UGent.be, Arno.Verlee@UGent.be, Thierry.Talou@ensiacet.fr, Wim.Soetaert@UGent.be,  
Inge.VanBogaert@UGent.be

Corresponding author: Chris.Stevens@UGent.be, SynBioC, Department of Sustainable Organic Chemistry and Technology, Ghent University, Coupure Links 653, 9000 Ghent, Belgium.

**Characterization data for petroselinic acid (1).**

**<sup>1</sup>H-NMR (400 MHz, CDCl<sub>3</sub>):**  $\delta_{\text{H}}$  0.88 (3H, t,  $J=6.8$  Hz,  $\underline{\text{CH}}_3$ ), 1.26-1.36 (18H, m,  $9 \times \underline{\text{CH}}_2$ ), 1.37-1.44 (2H, m,  $\underline{\text{CH}}_2(\underline{\text{CH}}_2)_2\text{COOH}$ ), 1.62-1.69 (2H, m,  $\underline{\text{CH}}_2\text{CH}_2\text{COOH}$ ), 2.01 (2H, dxt,  $J=7.0$  Hz,  $J=6.9$  Hz,  $\underline{\text{CH}}_2\text{CH}=\text{CH}$ ), 2.05 (2H, dxt,  $J=7.1$  Hz,  $J=7.1$  Hz,  $\underline{\text{CH}}_2\text{CH}=\text{CH}$ ), 2.36 (2H, t,  $J=7.5$  Hz,  $\underline{\text{CH}}_2\text{COOH}$ ), 5.29-5.41 (2H, m,  $\underline{\text{CH}}=\underline{\text{CH}}$ ), 11.60 (1H, br s,  $\underline{\text{COOH}}$ ). **<sup>13</sup>C-NMR (100 MHz, CDCl<sub>3</sub>):**  $\delta_{\text{C}}$  14.1 ( $\underline{\text{CH}}_3$ ), 22.7 ( $\underline{\text{CH}}_2$ ), 24.3 ( $\underline{\text{CH}}_2\text{CH}_2\text{COOH}$ ), 26.8 ( $\underline{\text{CH}}_2\text{CH}=\text{CH}$ ), 27.2 ( $\underline{\text{CH}}_2\text{CH}=\text{CH}$ ), 29.1 ( $\underline{\text{CH}}_2(\underline{\text{CH}}_2)_2\text{COOH}$ ), 29.3, 29.4, 29.6, 29.7, 29.7, 29.7, 31.9 ( $8 \times \underline{\text{CH}}_2$ ), 34.0 ( $\underline{\text{CH}}_2\text{COOH}$ ), 128.9 ( $\underline{\text{CH}}=\text{CH}$ ), 130.6 ( $\underline{\text{CH}}=\text{CH}$ ), 180.1 ( $\underline{\text{COOH}}$ ). **T<sub>m</sub>:** 30-31°C.

**Characterization data for petroselinic acid based diacetylated sophorolipid lactone (5).**

**<sup>1</sup>H-NMR (400 MHz, MeOD):**  $\delta_{\text{H}}$  1.23 (3H, d,  $J=6.2$  Hz,  $\text{CHCH}_3$ ), 1.31-1.50 (16H, m,  $7 \times \text{CH}_2(\text{CH}_2)_2$ ,  $\underline{\text{CH}}_a\text{H}_b\text{CHCH}_3$ ,  $\underline{\text{CH}}_a\text{H}_b\text{CH}_2\text{CHCH}_3$ ), 1.53-1.59 (2H, m,  $\text{CH}_a\text{H}_b\text{CHCH}_3$ ,  $\text{CH}_a\text{H}_b\text{CH}_2\text{CHCH}_3$ ), 1.61-1.74 (2H, m,  $\underline{\text{CH}}_2\text{CH}_2\text{C}=\text{O}$ ), 2.03-2.11 (4H, m,  $2 \times \underline{\text{CH}}_2\text{CH}=\text{CH}$ ), 2.06 (3H, s,  $\underline{\text{CH}}_3\text{C}=\text{O}$ ), 2.07 (3H, s,  $\underline{\text{CH}}_3\text{C}=\text{O}$ ), 2.33-2.47 (2H, m,  $\underline{\text{CH}}_2\text{C}=\text{O}$ ), 3.29-3.36 (2H, m,  $2 \times \underline{\text{CHOC}}$ ), 3.45 (1H, dxd,  $J=9.1$  Hz,  $J=7.7$  Hz,  $\underline{\text{CHOC}}$ ), 3.46-3.50 (1H, m,  $\underline{\text{CHOC}}$ ), 3.58 (1H, dxd,  $J=9.1$  Hz,  $J=9.1$  Hz,  $\underline{\text{CHOC}}$ ), 3.60 (1H, dxd,  $J=9.4$  Hz,  $J=9.4$  Hz,  $\underline{\text{CHOC}}$ ), 3.66 (1H, dxdxd,  $J=10.0$  Hz,  $J=3.8$  Hz,  $J=3.8$  Hz,  $\underline{\text{CHOC}}$ ), 3.71-3.79 (1H, m,  $\text{CH}_3\text{CHO}$ ), 4.09-4.14 (2H, m,  $\underline{\text{CH}}_2\text{OAc}$ ), 4.21 (1H, dxd,  $J=11.8$  Hz,  $J=6.4$  Hz,  $\underline{\text{CH}}_a\text{H}_b\text{OAc}$ ), 4.38 (1H, dxd,  $J=11.8$  Hz,  $J=2.1$  Hz,  $\text{CH}_a\text{H}_b\text{OAc}$ ), 4.46 (1H, d,  $J=7.6$  Hz,  $\text{CH}(\text{O})_2$ ), 4.67 (1H, dxd,  $J=7.7$  Hz,  $\text{CH}(\text{O})_2$ ), 4.84-4.89 (1H, m,  $\underline{\text{CHOC}}$ ), 5.33-5.43 (2H, m,  $\underline{\text{CH}}=\underline{\text{CH}}$ ). **<sup>13</sup>C-NMR (100 MHz, MeOD):**  $\delta_{\text{C}}$  19.3 ( $\underline{\text{CH}}_3\text{C}=\text{O}$ ), 19.5 ( $\underline{\text{CH}}_3\text{C}=\text{O}$ ), 20.5 ( $\underline{\text{CH}}_3\text{CH}$ ), 23.9 ( $\underline{\text{CH}}_2\text{CH}_2\text{C}=\text{O}$ ), 25.1 ( $\underline{\text{CH}}_2\text{CH}_2\text{CHCH}_3$ ), 26.1 ( $\underline{\text{CH}}_2\text{CH}=\text{CH}$ ), 26.6 ( $\underline{\text{CH}}_2\text{CH}=\text{CH}$ ), 28.5 ( $\underline{\text{CH}}_2(\underline{\text{CH}}_2)_2$ ), 29.0 ( $\underline{\text{CH}}_2(\underline{\text{CH}}_2)_2$ ), 29.2 ( $\underline{\text{CH}}_2(\underline{\text{CH}}_2)_2$ ), 29.7 ( $\underline{\text{CH}}_2(\underline{\text{CH}}_2)_2$ ), 29.7 ( $\underline{\text{CH}}_2(\underline{\text{CH}}_2)_2$ ), 29.8 ( $\underline{\text{CH}}_2(\underline{\text{CH}}_2)_2$ ), 30.0 ( $\underline{\text{CH}}_2(\underline{\text{CH}}_2)_2$ ), 33.2 ( $\underline{\text{CH}}_2\text{C}=\text{O}$ ), 37.2 ( $\underline{\text{CH}}_2\text{CHCH}_3$ ), 62.7 ( $\underline{\text{CH}}_2\text{OAc}$ ), 63.4 ( $\underline{\text{CH}}_2\text{OAc}$ ), 70.2 ( $\underline{\text{CHOC}}$ ), 70.5 ( $\underline{\text{CHOC}}$ ), 72.0 ( $\underline{\text{CHOC}}$ ), 73.4 ( $\underline{\text{CHOC}}$ ), 73.6 ( $\underline{\text{CHOC}}$ ), 75.2 ( $\underline{\text{CHOC}}$ ), 76.5 ( $\underline{\text{CHOC}}$ ), 78.7 ( $\underline{\text{CHOC}}$ ), 81.9 ( $\underline{\text{CHOC}}$ ), 102.2 ( $\underline{\text{CH}}(\text{O})_2$ ), 103.8 ( $\underline{\text{CH}}(\text{O})_2$ ), 128.6 ( $\underline{\text{CH}}=\text{CH}$ ), 130.5 ( $\underline{\text{CH}}=\text{CH}$ ), 107.8 ( $\underline{\text{C}}=\text{O}$ ), 171.3 ( $\underline{\text{C}}=\text{O}$ ), 172.9 ( $\underline{\text{C}}=\text{O}$ ).

**Characterization data for 17-L-([2 $\beta$ -O- $\beta$ -D-glucopyranosyl- $\beta$ -D-glucopyranosyl]-oxy)-cis-6-octadecenoic acid (7).**

**<sup>1</sup>H-NMR (400 MHz, MeOD):**  $\delta_{\text{H}}$  1.27 (3H, d,  $J=6.2$  Hz,  $\underline{\text{CH}}_3\text{CH}$ ), 1.30-1.48 (17H, m,  $8 \times \text{CH}_2(\text{CH}_2)_2$ ,  $\underline{\text{CH}}_a\text{H}_b\text{CHCH}_3$ ), 1.60-1.67 (3H, m,  $\text{CH}_a\text{H}_b\text{CHCH}_3$ ,  $\underline{\text{CH}}_2\text{CH}_2\text{COOH}$ ), 2.04-2.11 (4H, m,  $2 \times \underline{\text{CH}}_2\text{CH}=\text{CH}$ ), 2.31 (2H, t,  $J=7.4$  Hz,  $\underline{\text{CH}}_2\text{COOH}$ ), 3.47 (1H, dxd,  $J=8.4$  Hz,  $J=8.4$  Hz,  $\underline{\text{CHOC}}$ ), 3.58 (1H, dxd,  $J=8.7$  Hz,  $J=8.7$  Hz,  $\underline{\text{CHOC}}$ ), 3.66-3.71 (2H, m,  $2 \times \underline{\text{CH}}_a\text{H}_b\text{OH}$ ), 3.82-3.89 (3H, m,  $2 \times \text{CH}_a\text{H}_b\text{OH}$ ,  $\underline{\text{CHOC}}$ ), 4.47 (1H, d,  $J=7.7$  Hz,  $\underline{\text{CH}}(\text{O})_2$ ), 4.66 (1H, d,  $J=7.8$  Hz,  $\underline{\text{CH}}(\text{O})_2$ ), 5.33-5.43 (2H, m,  $\underline{\text{CH}}=\underline{\text{CH}}$ ). **<sup>13</sup>C-NMR (100 MHz, MeOD):**  $\delta_{\text{C}}$  20.5 ( $\underline{\text{CH}}_3\text{CH}$ ), 24.3 ( $\underline{\text{CH}}_2\text{CH}_2\text{COOH}$ ), 24.9 ( $\underline{\text{CH}}_2(\underline{\text{CH}}_2)_2$ ), 26.4 ( $\underline{\text{CH}}_2\text{CH}=\text{CH}$ ), 26.8 ( $\underline{\text{CH}}_2\text{CH}=\text{CH}$ ), 28.9 ( $\underline{\text{CH}}_2(\underline{\text{CH}}_2)_2$ ), 29.0 ( $\underline{\text{CH}}_2(\underline{\text{CH}}_2)_2$ ), 29.3 ( $\underline{\text{CH}}_2(\underline{\text{CH}}_2)_2$ ), 29.5-29.5 ( $3 \times \underline{\text{CH}}_2(\underline{\text{CH}}_2)_2$ ), 29.6 ( $\underline{\text{CH}}_2(\underline{\text{CH}}_2)_2$ ), 33.5 ( $\underline{\text{CH}}_2\text{COOH}$ ), 36.4 ( $\underline{\text{CH}}_2\text{CHCH}_3$ ), 3.24-3.36 (5H, m,  $\underline{\text{CHOC}}$ ), 3.40 (1H, dxd,  $J=8.7$  Hz,  $J=8.7$  Hz,  $\underline{\text{CHOC}}$ ), 61.3 ( $\underline{\text{CH}}_2\text{OH}$ ), 61.6 ( $\underline{\text{CH}}_2\text{OH}$ ), 70.1 ( $\underline{\text{CHOC}}$ ), 70.4 ( $\underline{\text{CHOC}}$ ), 74.4 ( $\underline{\text{CHOC}}$ ), 76.3 ( $2 \times \underline{\text{CHOC}}$ ), 76.8 ( $\underline{\text{CHOC}}$ ), 76.9 ( $\underline{\text{CHOC}}$ ), 77.5 ( $\underline{\text{CHOC}}$ ), 80.5 ( $\underline{\text{CHOC}}$ ), 101.3 ( $\underline{\text{CH}}(\text{O})_2$ ), 103.2 ( $\underline{\text{CH}}(\text{O})_2$ ), 128.9 ( $\underline{\text{CH}}=\text{CH}$ ), 129.9 ( $\underline{\text{CH}}=\text{CH}$ ), 176.2 ( $\underline{\text{COOH}}$ ).

**Characterization data for methyl 17-*L*-([2 $\beta$ -*O*- $\beta$ -*D*-glucopyranosyl- $\beta$ -*D*-glucopyranosyl]-oxy)-*cis*-6-octadecenoate (8).**

**<sup>1</sup>H-NMR (400 MHz, MeOD):**  $\delta_{\text{H}}$  1.27 (3H, d,  $J=6.2$  Hz,  $\text{CH}_3\text{CH}$ ), 1.31-1.50 (17H, m,  $\text{CH}_a\text{H}_b\text{CHCH}_3$ ,  $8\times\text{CH}_2(\text{CH}_2)_2$ ), 1.60-1.67 (3H, m,  $\text{CH}_a\text{H}_b\text{CHCH}_3$ ,  $\text{CH}_2\text{CH}_2\text{COOMe}$ ), 2.03-2.10 (4H, m,  $2\times\text{CH}_2\text{CH}=\text{CH}$ ), 2.34 (2H, t,  $J=7.4$  Hz,  $\text{CH}_2\text{COOMe}$ ), 3.23-3.36 (5H, m,  $\text{CHOC}$ ), 3.40 (1H, dxd,  $J=8.9$  Hz,  $J=8.9$  Hz,  $\text{CHOC}$ ), 3.45-3.49 (1H, m,  $\text{CHOC}$ ), 3.58 (1H, dxd,  $J=8.7$  Hz,  $J=8.7$  Hz,  $\text{CHOC}$ ), 3.65-3.70 (2H, m,  $2\times\text{CH}_a\text{H}_b\text{OH}$ ), 3.67 (3H, s,  $\text{OCH}_3$ ), 3.81-3.89 (3H, m,  $2\times\text{CH}_a\text{H}_b\text{OH}$ ,  $\text{CHOC}$ ), 4.47 (1H, d,  $J=7.7$  Hz,  $\text{CH}(\text{O})_2$ ), 4.66 (1H, d,  $J=7.8$  Hz,  $\text{CH}(\text{O})_2$ ), 5.32-5.43 (2H, m,  $\text{CH}=\text{CH}$ ). **<sup>13</sup>C-NMR (100 MHz, MeOD):**  $\delta_{\text{C}}$  20.5 ( $\text{CH}_3\text{CH}$ ), 24.2 ( $\text{CH}_2\text{CH}_2\text{COOMe}$ ), 24.9 ( $\text{CH}_2(\text{CH}_2)_2$ ), 26.4 ( $\text{CH}_2\text{CH}=\text{CH}$ ), 26.8 ( $\text{CH}_2\text{CH}=\text{CH}$ ), 28.9 ( $\text{CH}_2(\text{CH}_2)_2$ ), 29.0 ( $\text{CH}_2(\text{CH}_2)_2$ ), 29.3 ( $\text{CH}_2(\text{CH}_2)_2$ ), 29.5 ( $3\times\text{CH}_2(\text{CH}_2)_2$ ), 29.6 ( $\text{CH}_2(\text{CH}_2)_2$ ), 33.3 ( $\text{CH}_2\text{COOMe}$ ), 36.5 ( $\text{CH}_2\text{CHCH}_3$ ), 50.7 ( $\text{OCH}_3$ ), 61.4 ( $\text{CH}_2\text{OH}$ ), 61.7 ( $\text{CH}_2\text{OH}$ ), 70.1 ( $\text{CHOC}$ ), 70.4 ( $\text{CHOC}$ ), 74.5 ( $\text{CHOC}$ ), 76.4 ( $2\times\text{CHOC}$ ), 76.8 ( $\text{CHOC}$ ), 76.9 ( $\text{CHOC}$ ), 77.5 ( $\text{CHOC}$ ), 80.5 ( $\text{CHOC}$ ), 101.3 ( $\text{CH}(\text{O})_2$ ), 103.3 ( $\text{CH}(\text{O})_2$ ), 128.9 ( $\text{CH}=\text{CH}$ ), 130.0 ( $\text{CH}=\text{CH}$ ), 174.5 ( $\text{COOMe}$ ).

**Characterization data for methyl 17-*L*-([2 $\beta$ ,3 $\beta$ ,3 $\beta$ ,4 $\beta$ ,4 $\beta$ ,6 $\beta$ ,6 $\beta$ -heptaacetoxy-2 $\beta$ -*O*- $\beta$ -*D*-glucopyranosyl- $\beta$ -*D*-glucopyranosyl]-oxy)-*cis*-6-octadecenoate (9).**

**<sup>1</sup>H-NMR (400 MHz, CDCl<sub>3</sub>):**  $\delta_{\text{H}}$  1.22 (3H, d,  $J=6.2$  Hz,  $\text{CH}_3\text{CH}$ ), 1.26-1.41 (17H, m,  $\text{CH}_a\text{H}_b\text{CHCH}_3$ ,  $8\times\text{CH}_2(\text{CH}_2)_2$ ), 1.56-1.68 (3H, m,  $\text{CH}_a\text{H}_b\text{CHCH}_3$ ,  $\text{CH}_2\text{CH}_2\text{COOMe}$ ), 1.98-2.08 (4H, m,  $2\times\text{CH}_2\text{CH}=\text{CH}$ ), 1.98 (3H, s,  $\text{CH}_3\text{C}=\text{O}$ ), 2.00 (3H, s,  $\text{CH}_3\text{C}=\text{O}$ ), 2.01 (3H, s,  $\text{CH}_3\text{C}=\text{O}$ ), 2.03 (3H, s,  $\text{CH}_3\text{C}=\text{O}$ ), 2.06 (3H, s,  $\text{CH}_3\text{C}=\text{O}$ ), 2.06 (6H, s,  $2\times\text{CH}_3\text{C}=\text{O}$ ), 2.31 (2H, t,  $J=7.5$  Hz,  $\text{CH}_2\text{COOMe}$ ), 3.63-3.75 (4H, m,  $2\times\text{CHCH}_2\text{OAc}$ ,  $\text{CH}_3\text{CHO}$ ,  $\text{CHOC}$ ), 3.67 (3H, s,  $\text{OCH}_3$ ), 4.06-4.10 (2H, m,  $2\times\text{CH}_a\text{H}_b\text{OAc}$ ), 4.22-4.31 (2H, m,  $2\times\text{CH}_a\text{H}_b\text{OAc}$ ), 4.48 (1H, d,  $J=7.6$  Hz,  $\text{CH}(\text{O})_2$ ), 4.73 (1H, d,  $J=8.0$  Hz,  $\text{CH}(\text{O})_2$ ), 4.91 (1H, dxd,  $J=8.9$  Hz,  $J=7.8$  Hz,  $\text{CHOC}$ ), 4.93 (1H, dxd,  $J=9.6$  Hz,  $J=9.6$  Hz,  $\text{CHOC}$ ), 5.06 (1H, dxd,  $J=9.5$  Hz,  $J=9.5$  Hz,  $\text{CHOC}$ ), 5.13 (1H, dxd,  $J=9.3$  Hz,  $J=9.3$  Hz,  $\text{CHOC}$ ), 5.16 (1H, dxd,  $J=9.5$  Hz,  $J=9.5$  Hz,  $\text{CHOC}$ ), 5.29-5.40 (2H, m,  $\text{CH}=\text{CH}$ ). **<sup>13</sup>C-NMR (100 MHz, CDCl<sub>3</sub>):**  $\delta_{\text{C}}$  20.5 ( $\text{CH}_3\text{C}=\text{O}$ ), 20.5 ( $2\times\text{CH}_3\text{C}=\text{O}$ ), 20.6 ( $\text{CH}_3\text{C}=\text{O}$ ), 20.7 ( $2\times\text{CH}_3\text{C}=\text{O}$ ), 20.8 ( $\text{CH}_3\text{C}=\text{O}$ ), 21.2 ( $\text{CH}_3\text{CH}$ ), 24.6 ( $\text{CH}_2\text{CH}_2\text{COOMe}$ ), 25.1 ( $\text{CH}_2(\text{CH}_2)_2$ ), 26.8 ( $\text{CH}_2\text{CH}=\text{CH}$ ), 27.2 ( $\text{CH}_2\text{CH}=\text{CH}$ ), 29.2 ( $\text{CH}_2(\text{CH}_2)_2$ ), 29.3 ( $\text{CH}_2(\text{CH}_2)_2$ ), 29.6 ( $\text{CH}_2(\text{CH}_2)_2$ ), 29.7 ( $\text{CH}_2(\text{CH}_2)_2$ ), 29.7 ( $2\times\text{CH}_2(\text{CH}_2)_2$ ), 29.8 ( $\text{CH}_2(\text{CH}_2)_2$ ), 34.0 ( $\text{CH}_2\text{COOMe}$ ), 36.5 ( $\text{CH}_2\text{CHCH}_3$ ), 51.4 ( $\text{OCH}_3$ ), 62.0 ( $\text{CH}_2\text{OAc}$ ), 62.2 ( $\text{CH}_2\text{OAc}$ ), 68.2 ( $\text{CHOC}$ ), 68.9 ( $\text{CHOC}$ ), 71.3 ( $\text{CHOC}$ ), 71.7 ( $\text{CHOC}$ ), 71.8 ( $\text{CHOC}$ ), 73.1 ( $\text{CHOC}$ ), 74.6 ( $\text{CHOC}$ ), 77.7 ( $\text{CHOC}$ ), 77.9 ( $\text{CHOC}$ ), 100.4 ( $\text{CH}(\text{O})_2$ ), 101.1 ( $\text{CH}(\text{O})_2$ ), 129.0 ( $\text{CH}=\text{CH}$ ), 130.5 ( $\text{CH}=\text{CH}$ ), 169.2 ( $\text{CH}_3\text{C}=\text{O}$ ), 169.4 ( $\text{CH}_3\text{C}=\text{O}$ ), 169.7 ( $\text{CH}_3\text{C}=\text{O}$ ), 170.0 ( $\text{CH}_3\text{C}=\text{O}$ ), 170.3 ( $\text{CH}_3\text{C}=\text{O}$ ), 170.6 ( $\text{CH}_3\text{C}=\text{O}$ ), 170.6 ( $\text{CH}_3\text{C}=\text{O}$ ), 174.1 ( $\text{COOMe}$ ).

**Characterization data for 8-*L*-([2 $\beta$ ,3 $\beta$ ,3 $\beta$ ,4 $\beta$ ,4 $\beta$ ,6 $\beta$ ,6 $\beta$ -heptaacetoxy-2 $\beta$ -*O*- $\beta$ -*D*-glucopyranosyl- $\beta$ -*D*-glucopyranosyl]-oxy)-dodecanal (4).**

**<sup>1</sup>H-NMR (400 MHz, CDCl<sub>3</sub>):**  $\delta_{\text{H}}$  1.22 (3H, d,  $J=6.2$  Hz,  $\text{CH}_3\text{CH}$ ), 1.26-1.43 (13H, m,  $6\times\text{CH}_2(\text{CH}_2)_2$ ,  $\text{CH}_a\text{H}_b\text{CHCH}_3$ ), 1.55-1.69 (3H,  $\text{CH}_a\text{H}_b\text{CHCH}_3$ ,  $\text{CH}_2\text{CH}_2(\text{C}=\text{O})\text{H}$ ), 1.99 (3H, s,  $\text{CH}_3\text{C}=\text{O}$ ), 2.00 (3H, s,  $\text{CH}_3\text{C}=\text{O}$ ), 2.01 (3H, s,  $\text{CH}_3\text{C}=\text{O}$ ), 2.03 (3H, s,  $\text{CH}_3\text{C}=\text{O}$ ), 2.06 (3H, s,  $\text{CH}_3\text{C}=\text{O}$ ), 2.08 (6H, s,  $2\times\text{CH}_3\text{C}=\text{O}$ ), 2.42 (2H, txd,  $J=7.4$  Hz,  $J=1.9$  Hz,  $\text{CH}_2(\text{C}=\text{O})\text{H}$ ), 3.63-3.74 (4H, m,  $2\times\text{CHCH}_2\text{OAc}$ ,  $\text{CH}_3\text{CHO}$ ,  $\text{CHOC}$ ), 4.06-4.10 (2H, m,  $2\times\text{CH}_a\text{H}_b\text{OAc}$ ), 4.22-4.31 (2H, m,  $2\times\text{CH}_a\text{H}_b\text{OAc}$ ), 4.47 (1H, d,  $J=7.6$  Hz,  $\text{CH}(\text{O})_2$ ), 4.72 (1H, d,  $J=8.0$  Hz,  $\text{CH}(\text{O})_2$ ), 4.91 (1H, dxd,  $J=9.3$  Hz,  $J=8.4$  Hz,  $\text{CHOC}$ ), 4.93 (1H, dxd,  $J=9.7$  Hz,  $J=9.7$  Hz,  $\text{CHOC}$ ), 5.06 (1H, dxd,  $J=9.6$  Hz,  $J=9.6$  Hz,  $\text{CHOC}$ ), 5.13 (1H, dxd,

$J=9.4$  Hz,  $J=9.4$  Hz,  $\underline{\text{C}}\underline{\text{H}}\underline{\text{O}}\underline{\text{C}}$ ), 5.16 (1H, dxd,  $J=9.5$  Hz,  $J=9.5$  Hz,  $\underline{\text{C}}\underline{\text{H}}\underline{\text{O}}\underline{\text{C}}$ ), 9.76 (1H, t,  $J=1.9$  Hz,  $\underline{\text{H}}\underline{\text{C}}=\underline{\text{O}}$ ).  $^{13}\text{C-NMR}$  (100 MHz,  $\text{CDCl}_3$ ):  $\delta_{\text{C}}$  20.5 ( $\underline{\text{C}}\underline{\text{H}}_3\underline{\text{C}}=\underline{\text{O}}$ ), 20.5 ( $2\times\underline{\text{C}}\underline{\text{H}}_3\underline{\text{C}}=\underline{\text{O}}$ ), 20.6 ( $\underline{\text{C}}\underline{\text{H}}_3\underline{\text{C}}=\underline{\text{O}}$ ), 20.7 ( $2\times\underline{\text{C}}\underline{\text{H}}_3\underline{\text{C}}=\underline{\text{O}}$ ), 20.8 ( $\underline{\text{C}}\underline{\text{H}}_3\underline{\text{C}}=\underline{\text{O}}$ ), 21.3 ( $\underline{\text{C}}\underline{\text{H}}_3\underline{\text{C}}\underline{\text{H}}$ ), 22.1 ( $\underline{\text{C}}\underline{\text{H}}_2\underline{\text{C}}\underline{\text{H}}_2(\underline{\text{C}}=\underline{\text{O}})\underline{\text{H}}$ ), 25.0 ( $\underline{\text{C}}\underline{\text{H}}_2(\underline{\text{C}}\underline{\text{H}}_2)_2$ ), 29.1 ( $\underline{\text{C}}\underline{\text{H}}_2(\underline{\text{C}}\underline{\text{H}}_2)_2$ ), 29.3 ( $\underline{\text{C}}\underline{\text{H}}_2(\underline{\text{C}}\underline{\text{H}}_2)_2$ ), 29.4 ( $\underline{\text{C}}\underline{\text{H}}_2(\underline{\text{C}}\underline{\text{H}}_2)_2$ ), 29.7 ( $\underline{\text{C}}\underline{\text{H}}_2(\underline{\text{C}}\underline{\text{H}}_2)_2$ ), 29.7 ( $\underline{\text{C}}\underline{\text{H}}_2(\underline{\text{C}}\underline{\text{H}}_2)_2$ ), 36.5 ( $\underline{\text{C}}\underline{\text{H}}_2\underline{\text{C}}\underline{\text{H}}\underline{\text{C}}\underline{\text{H}}_3$ ), 43.9 ( $\underline{\text{C}}\underline{\text{H}}_2(\underline{\text{C}}=\underline{\text{O}})\underline{\text{H}}$ ), 62.0 ( $\underline{\text{C}}\underline{\text{H}}_2\underline{\text{O}}\underline{\text{A}}\underline{\text{c}}$ ), 62.3 ( $\underline{\text{C}}\underline{\text{H}}_2\underline{\text{O}}\underline{\text{A}}\underline{\text{c}}$ ), 68.3 ( $\underline{\text{C}}\underline{\text{H}}\underline{\text{O}}\underline{\text{C}}$ ), 68.9 ( $\underline{\text{C}}\underline{\text{H}}\underline{\text{O}}\underline{\text{C}}$ ), 71.3 ( $\underline{\text{C}}\underline{\text{H}}\underline{\text{O}}\underline{\text{C}}$ ), 71.6 ( $\underline{\text{C}}\underline{\text{H}}\underline{\text{O}}\underline{\text{C}}$ ), 71.8 ( $\underline{\text{C}}\underline{\text{H}}\underline{\text{O}}\underline{\text{C}}$ ), 73.0 ( $\underline{\text{C}}\underline{\text{H}}\underline{\text{O}}\underline{\text{C}}$ ), 74.7 ( $\underline{\text{C}}\underline{\text{H}}\underline{\text{O}}\underline{\text{C}}$ ), 77.6 ( $\underline{\text{C}}\underline{\text{H}}\underline{\text{O}}\underline{\text{C}}$ ), 78.0 ( $\underline{\text{C}}\underline{\text{H}}\underline{\text{O}}\underline{\text{C}}$ ), 100.4 ( $\underline{\text{C}}\underline{\text{H}}(\underline{\text{O}})_2$ ), 101.2 ( $\underline{\text{C}}\underline{\text{H}}(\underline{\text{O}})_2$ ), 169.3 ( $\underline{\text{C}}\underline{\text{H}}_3\underline{\text{C}}=\underline{\text{O}}$ ), 169.4 ( $\underline{\text{C}}\underline{\text{H}}_3\underline{\text{C}}=\underline{\text{O}}$ ), 169.7 ( $\underline{\text{C}}\underline{\text{H}}_3\underline{\text{C}}=\underline{\text{O}}$ ), 170.0 ( $\underline{\text{C}}\underline{\text{H}}_3\underline{\text{C}}=\underline{\text{O}}$ ), 170.3 ( $\underline{\text{C}}\underline{\text{H}}_3\underline{\text{C}}=\underline{\text{O}}$ ), 170.6 ( $\underline{\text{C}}\underline{\text{H}}_3\underline{\text{C}}=\underline{\text{O}}$ ), 170.6 ( $\underline{\text{C}}\underline{\text{H}}_3\underline{\text{C}}=\underline{\text{O}}$ ), 203.0 ( $\underline{\text{H}}\underline{\text{C}}=\underline{\text{O}}$ ).

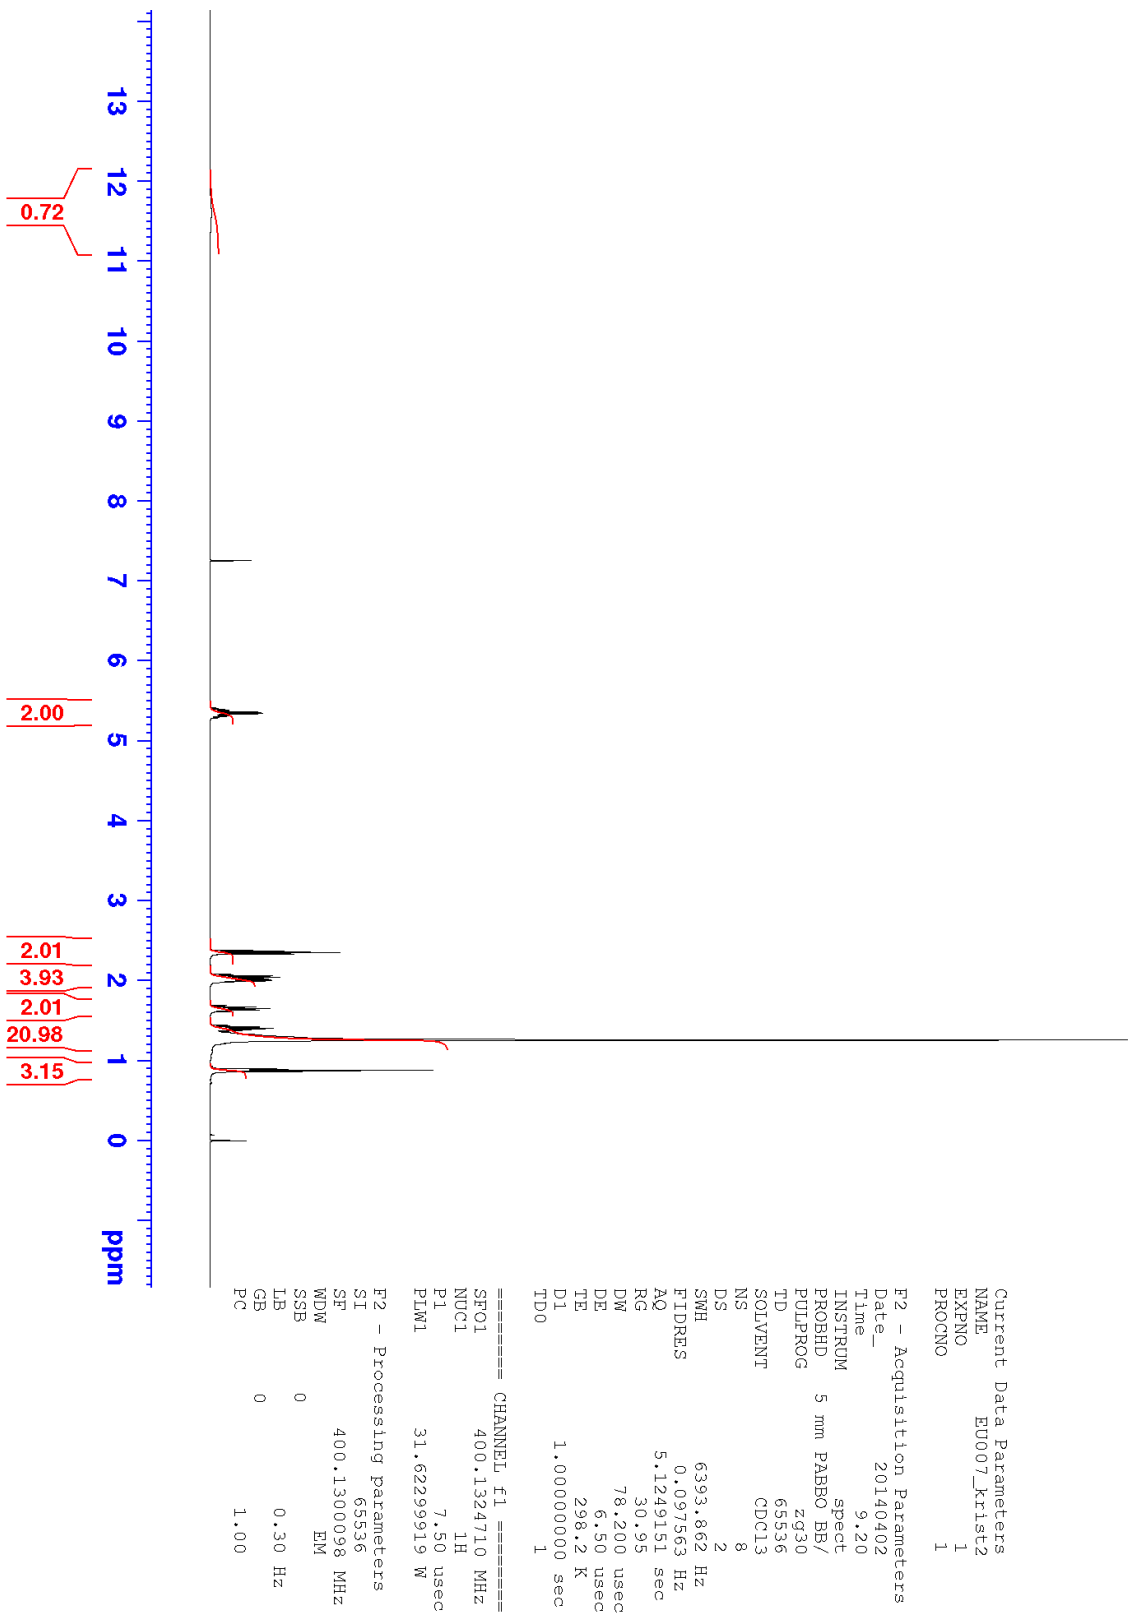

Fig. S1. <sup>1</sup>H-NMR spectrum for compound 1

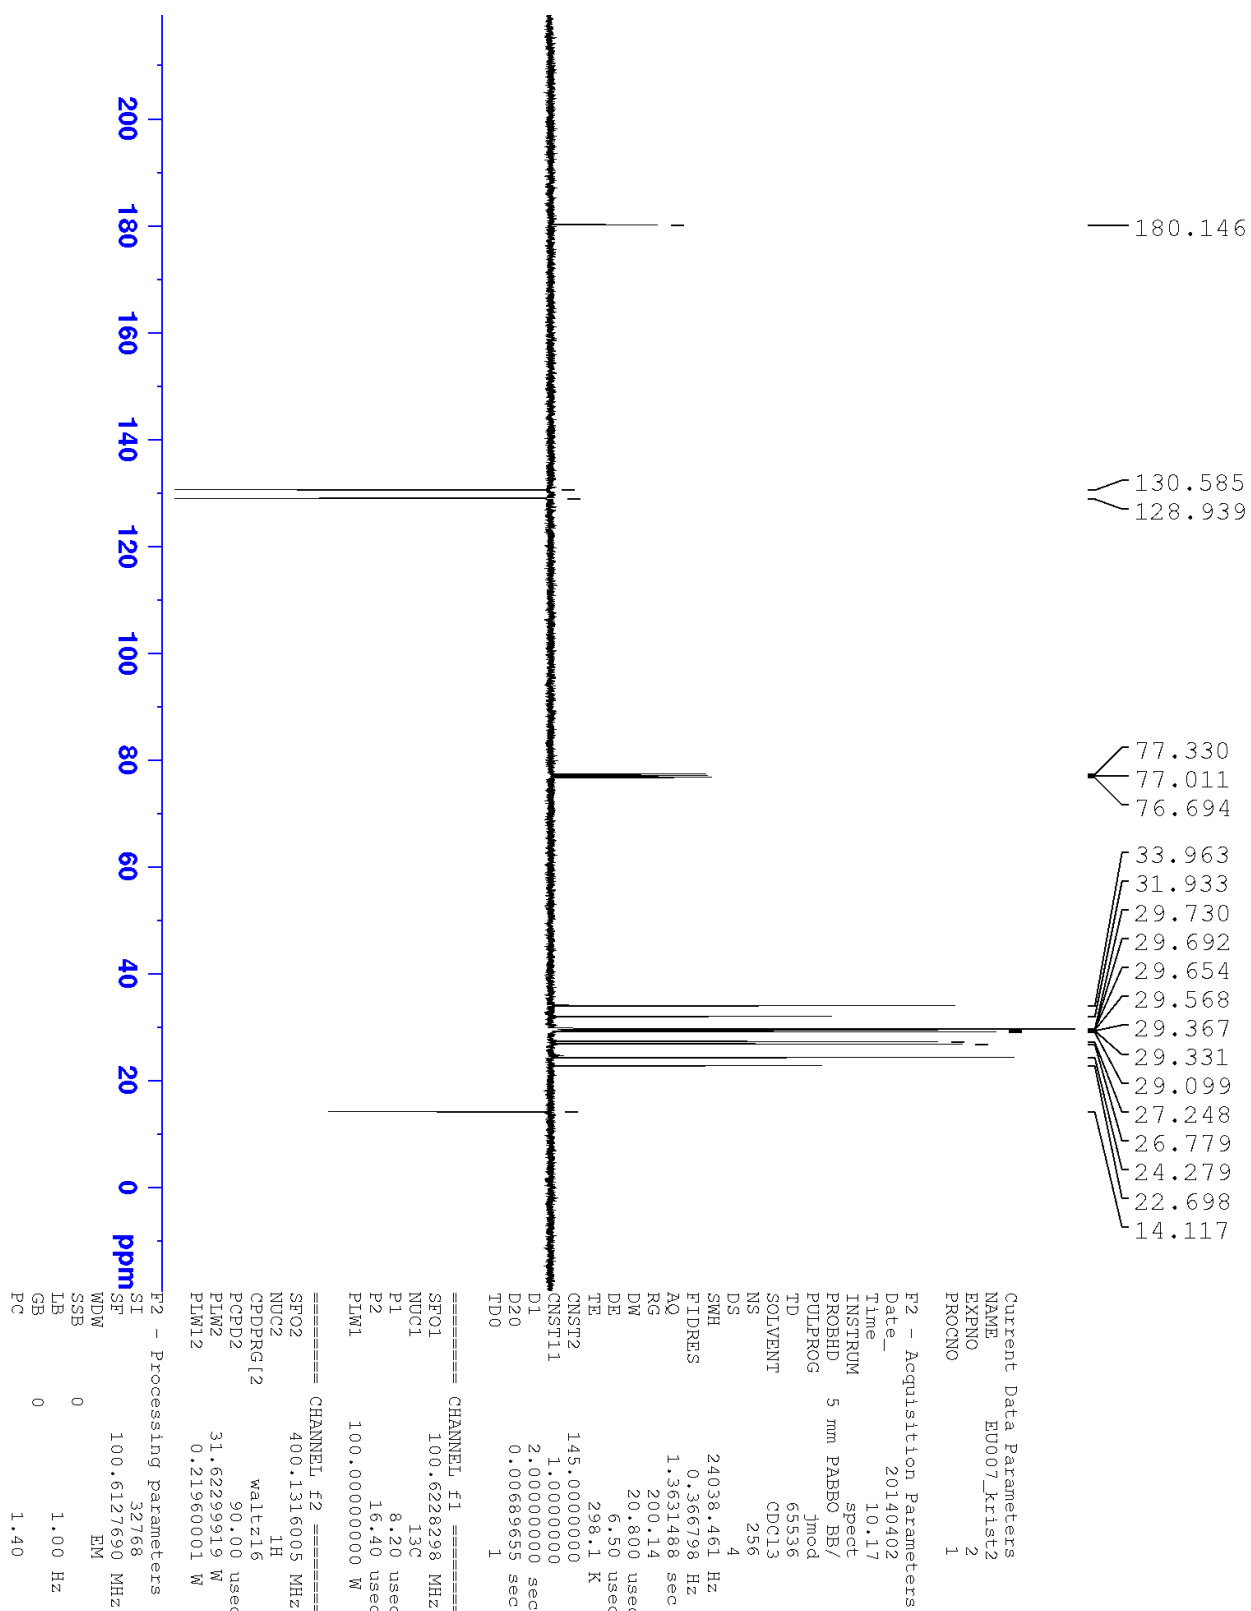

Fig. S2. <sup>13</sup>C-NMR spectrum for compound 1

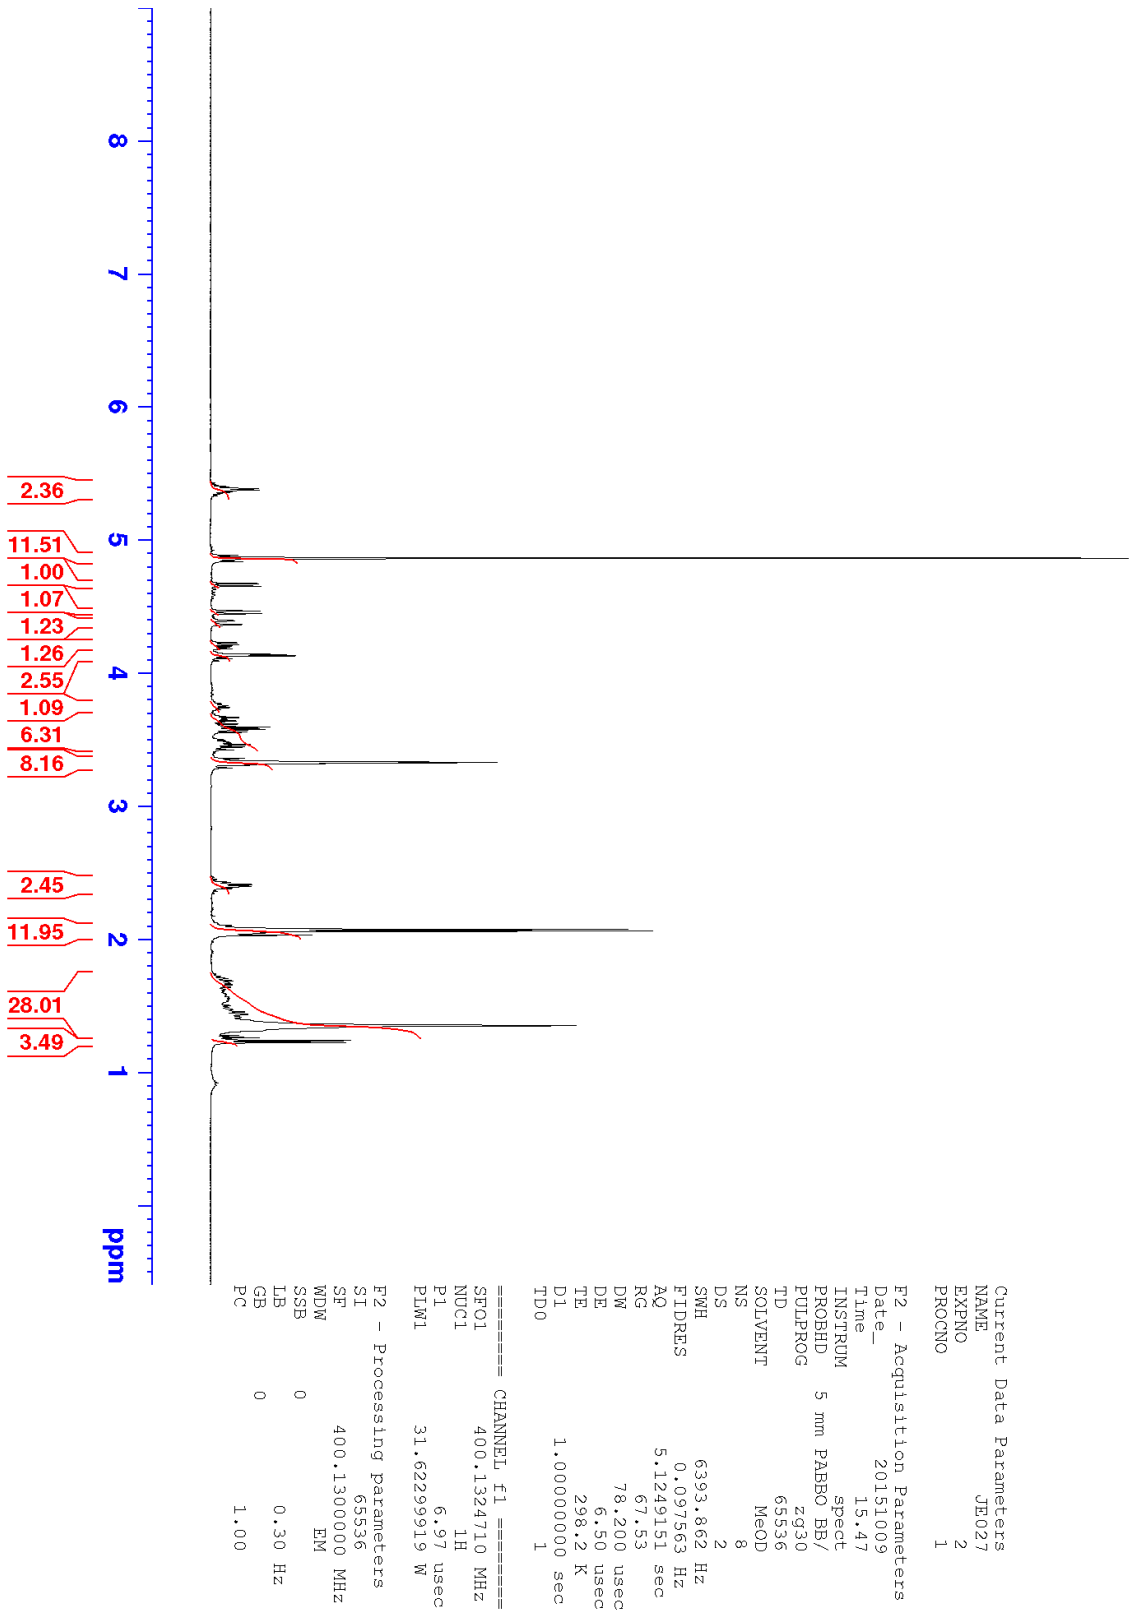

Fig. S3. <sup>1</sup>H-NMR spectrum for compound 5

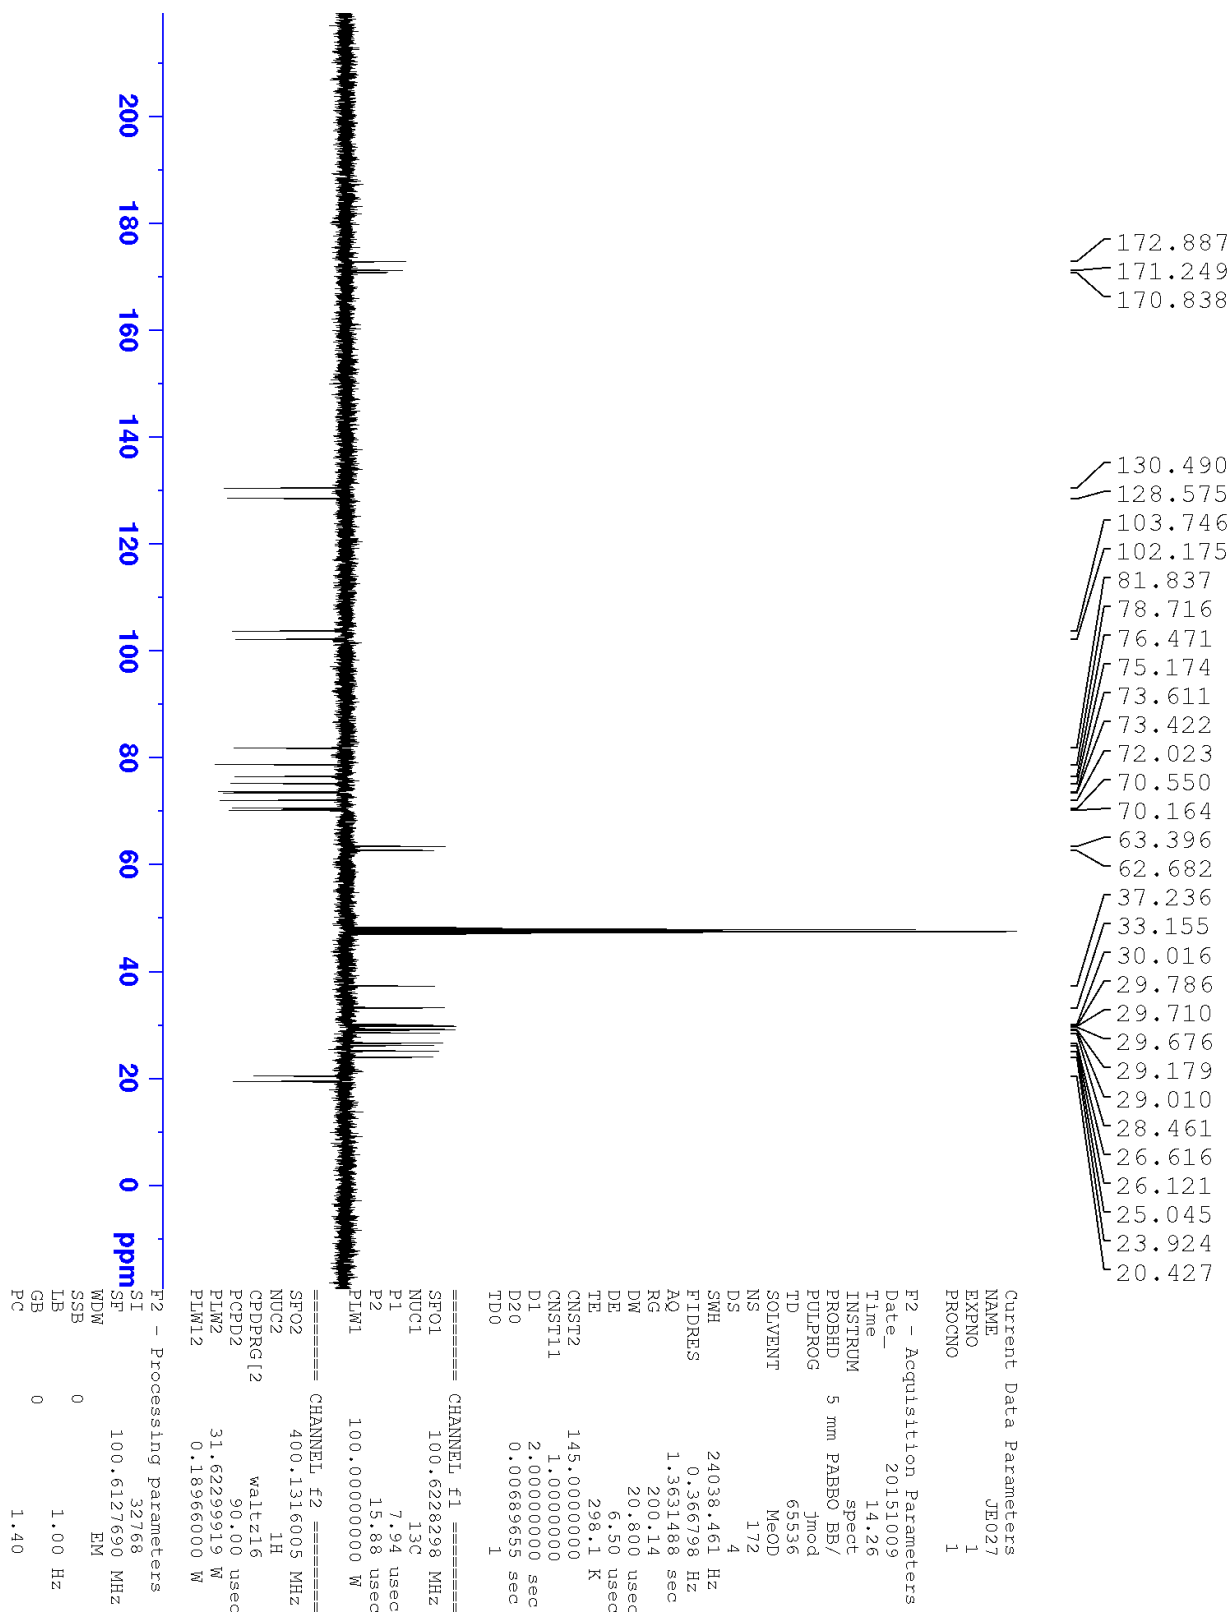

Fig. S4. <sup>13</sup>C-NMR spectrum for compound 5



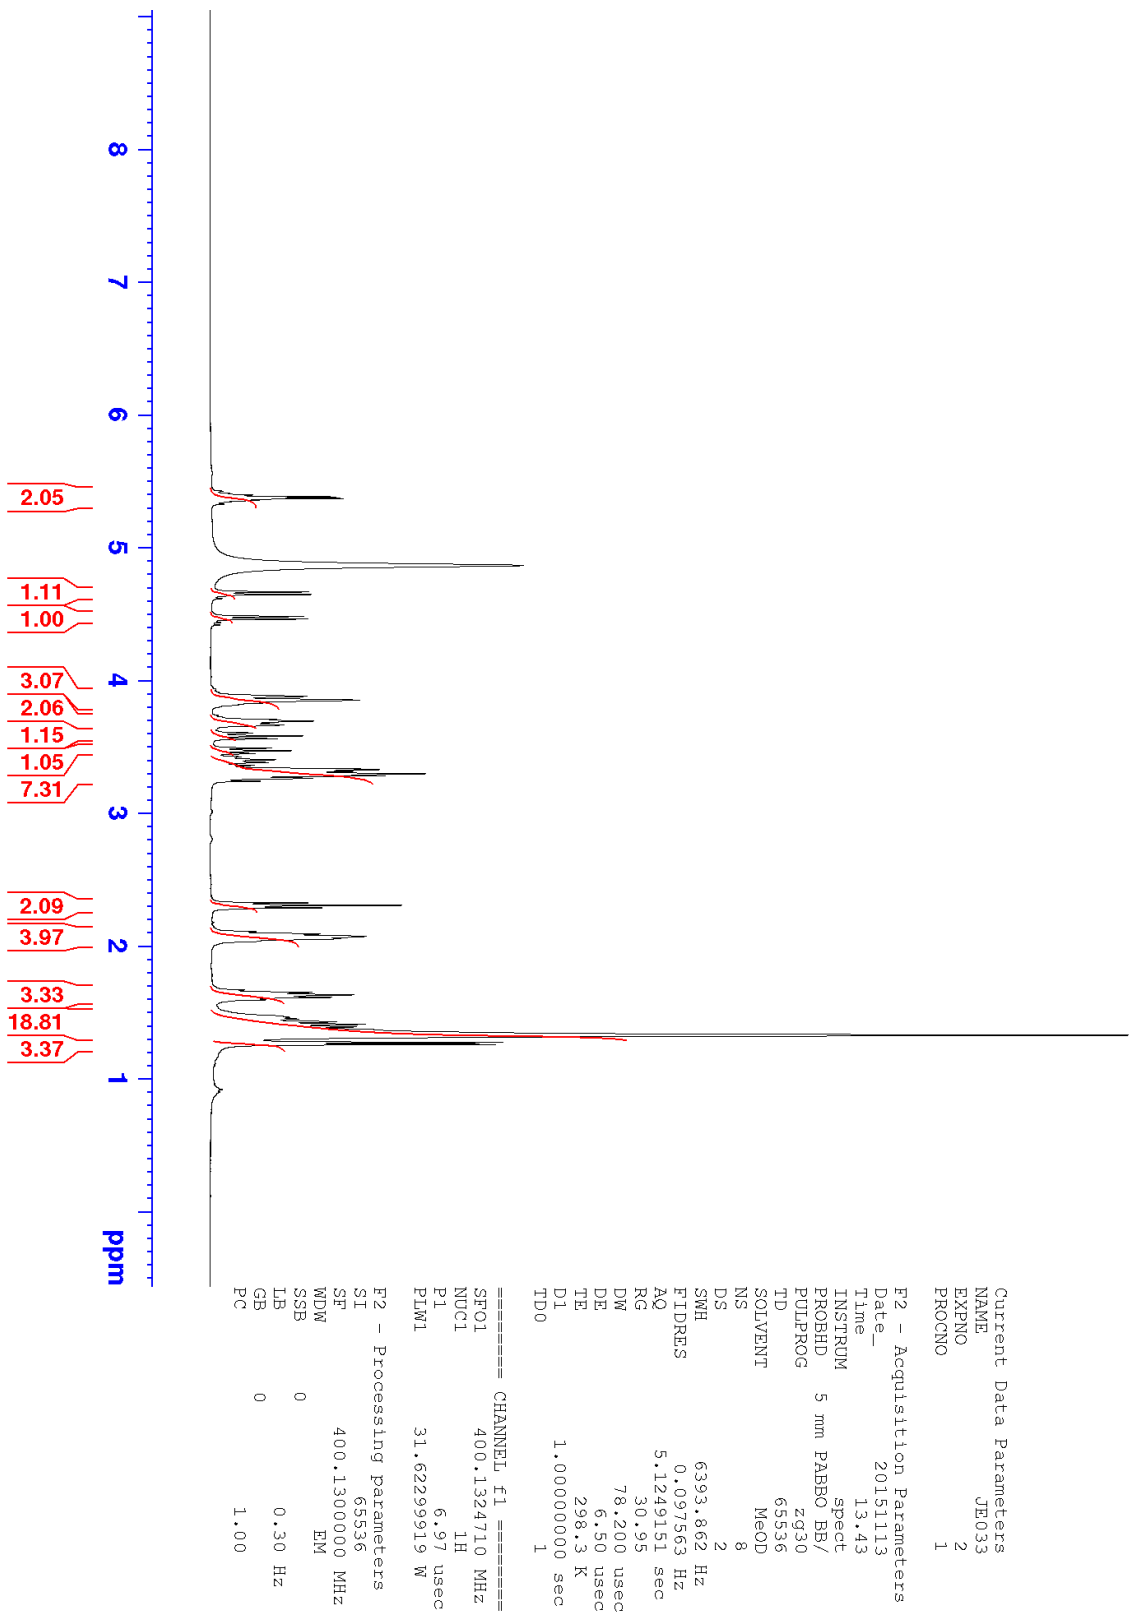

Fig. S5. <sup>1</sup>H-NMR spectrum for compound 7

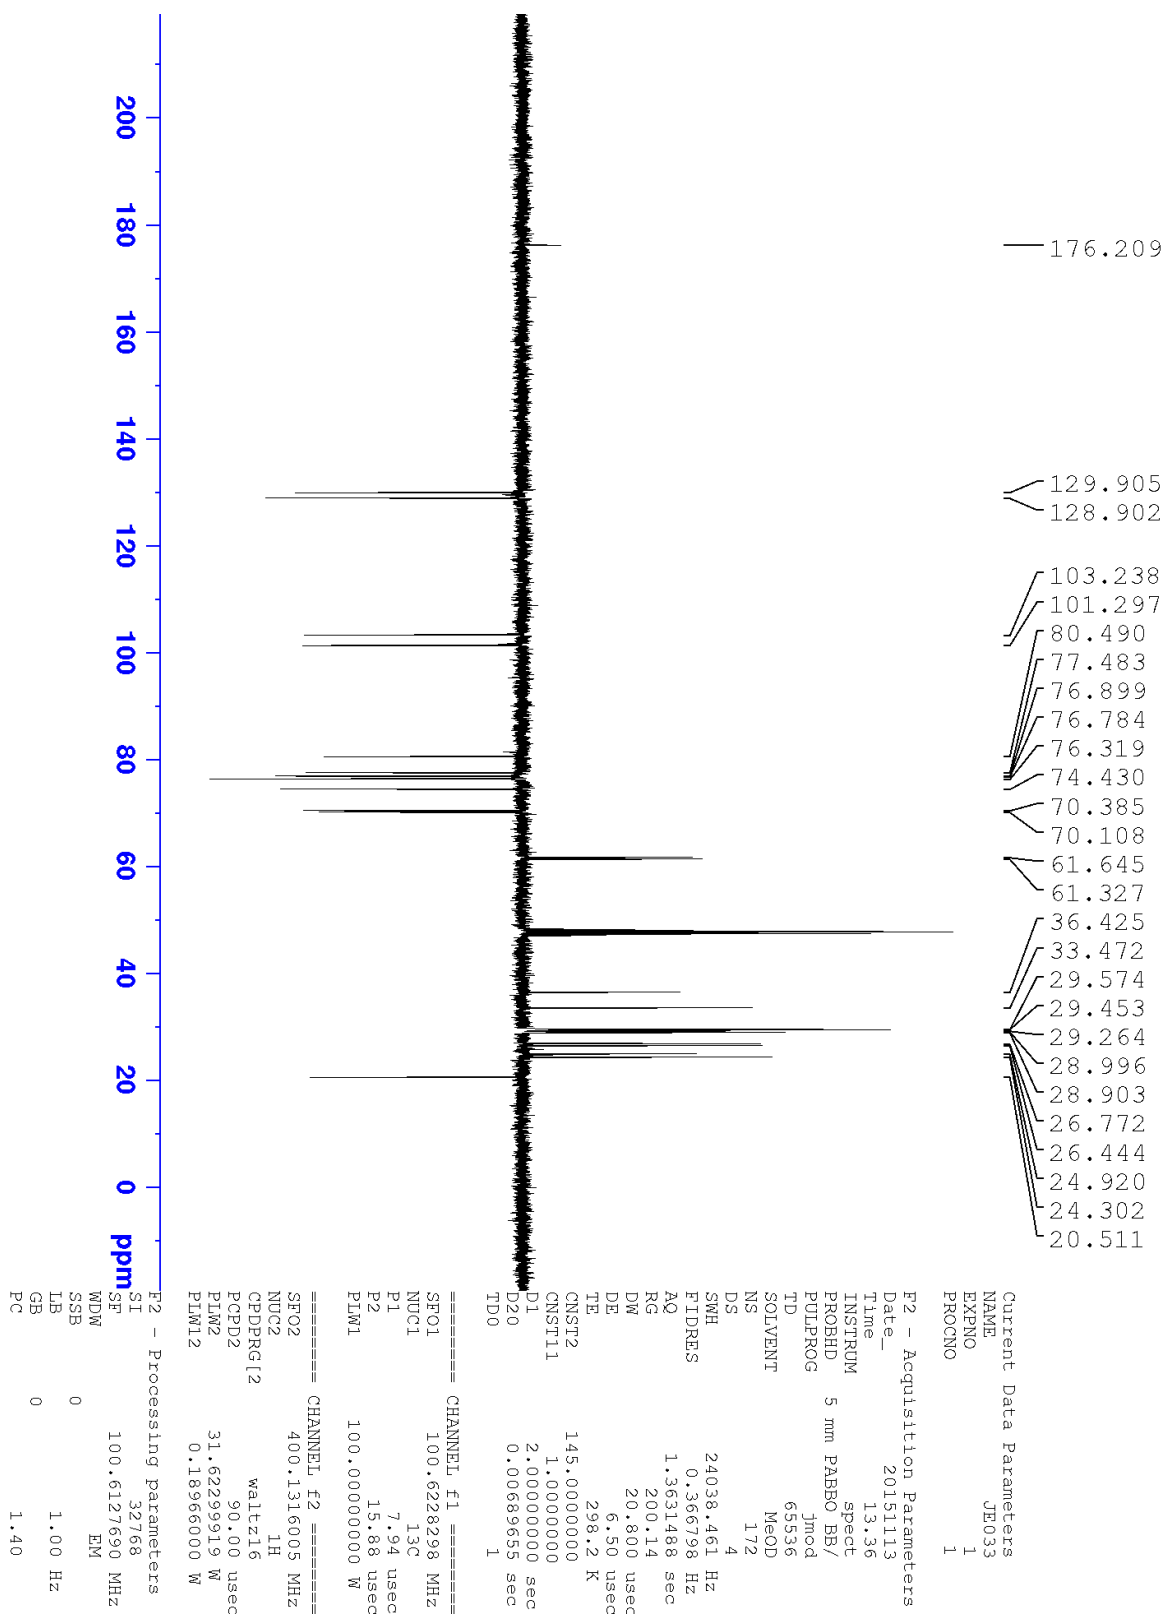

Fig. S6. <sup>13</sup>C-NMR spectrum for compound 7

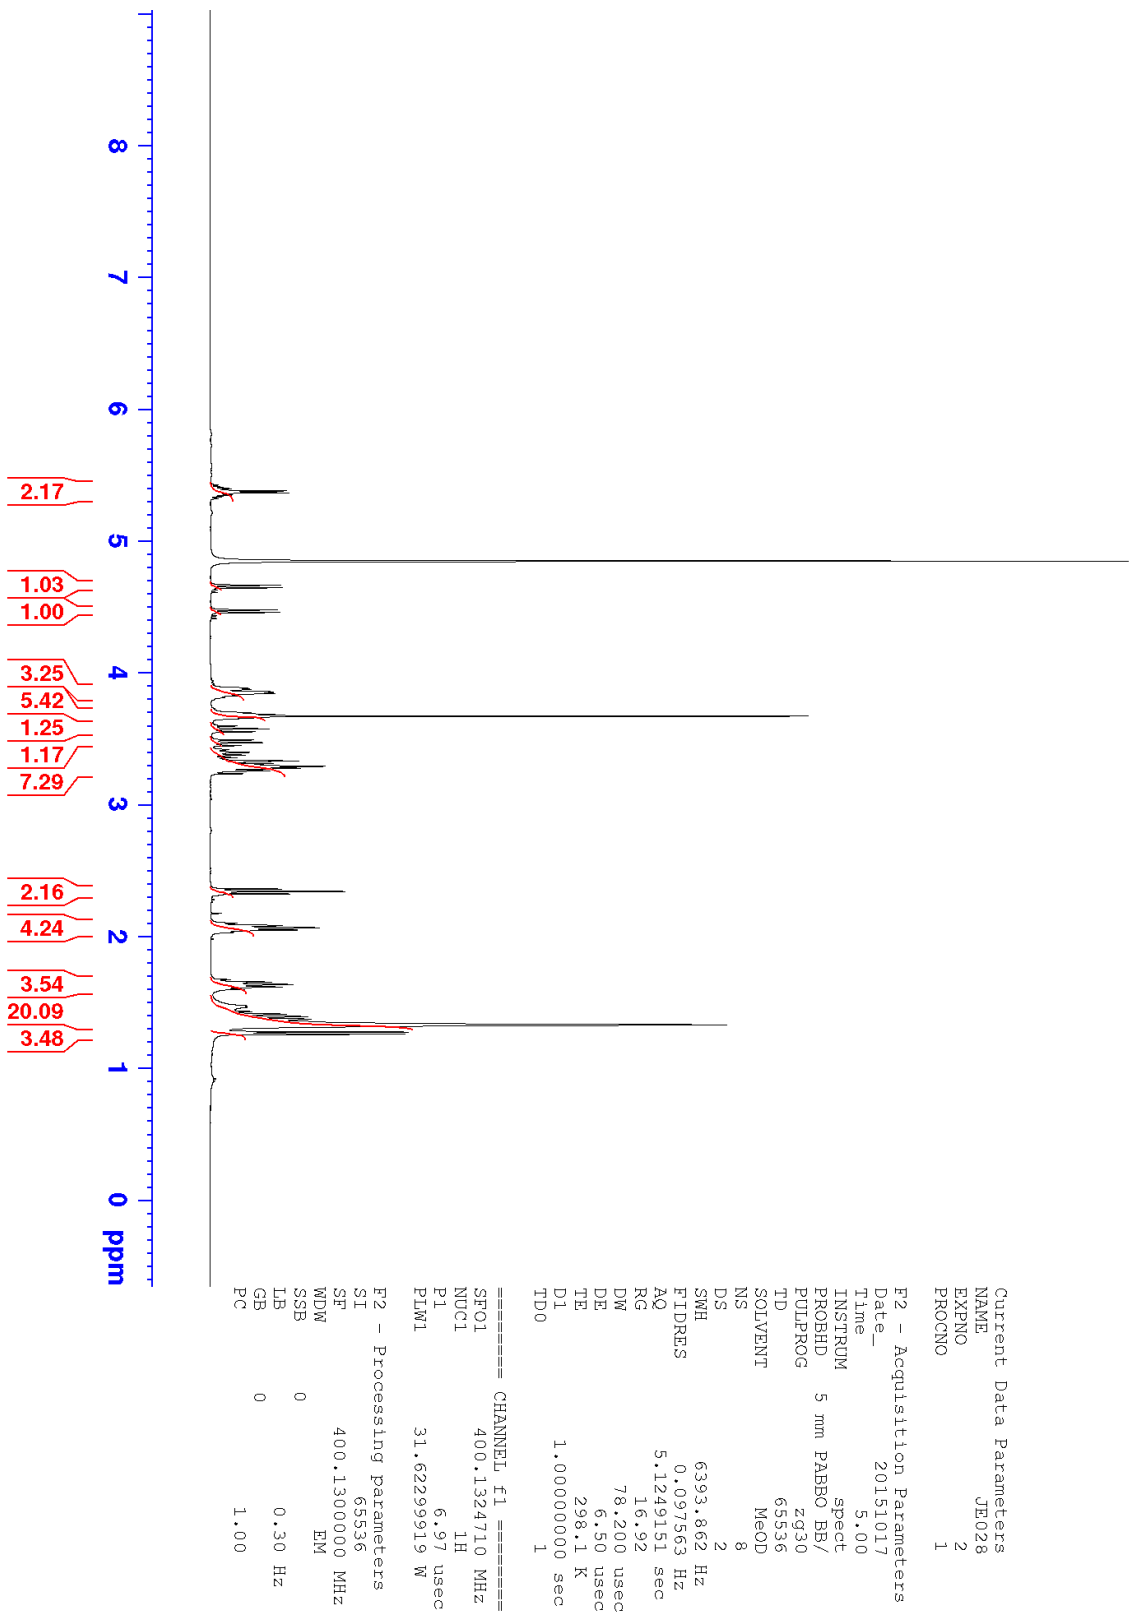

Fig. S7. <sup>1</sup>H-NMR spectrum for compound **8**

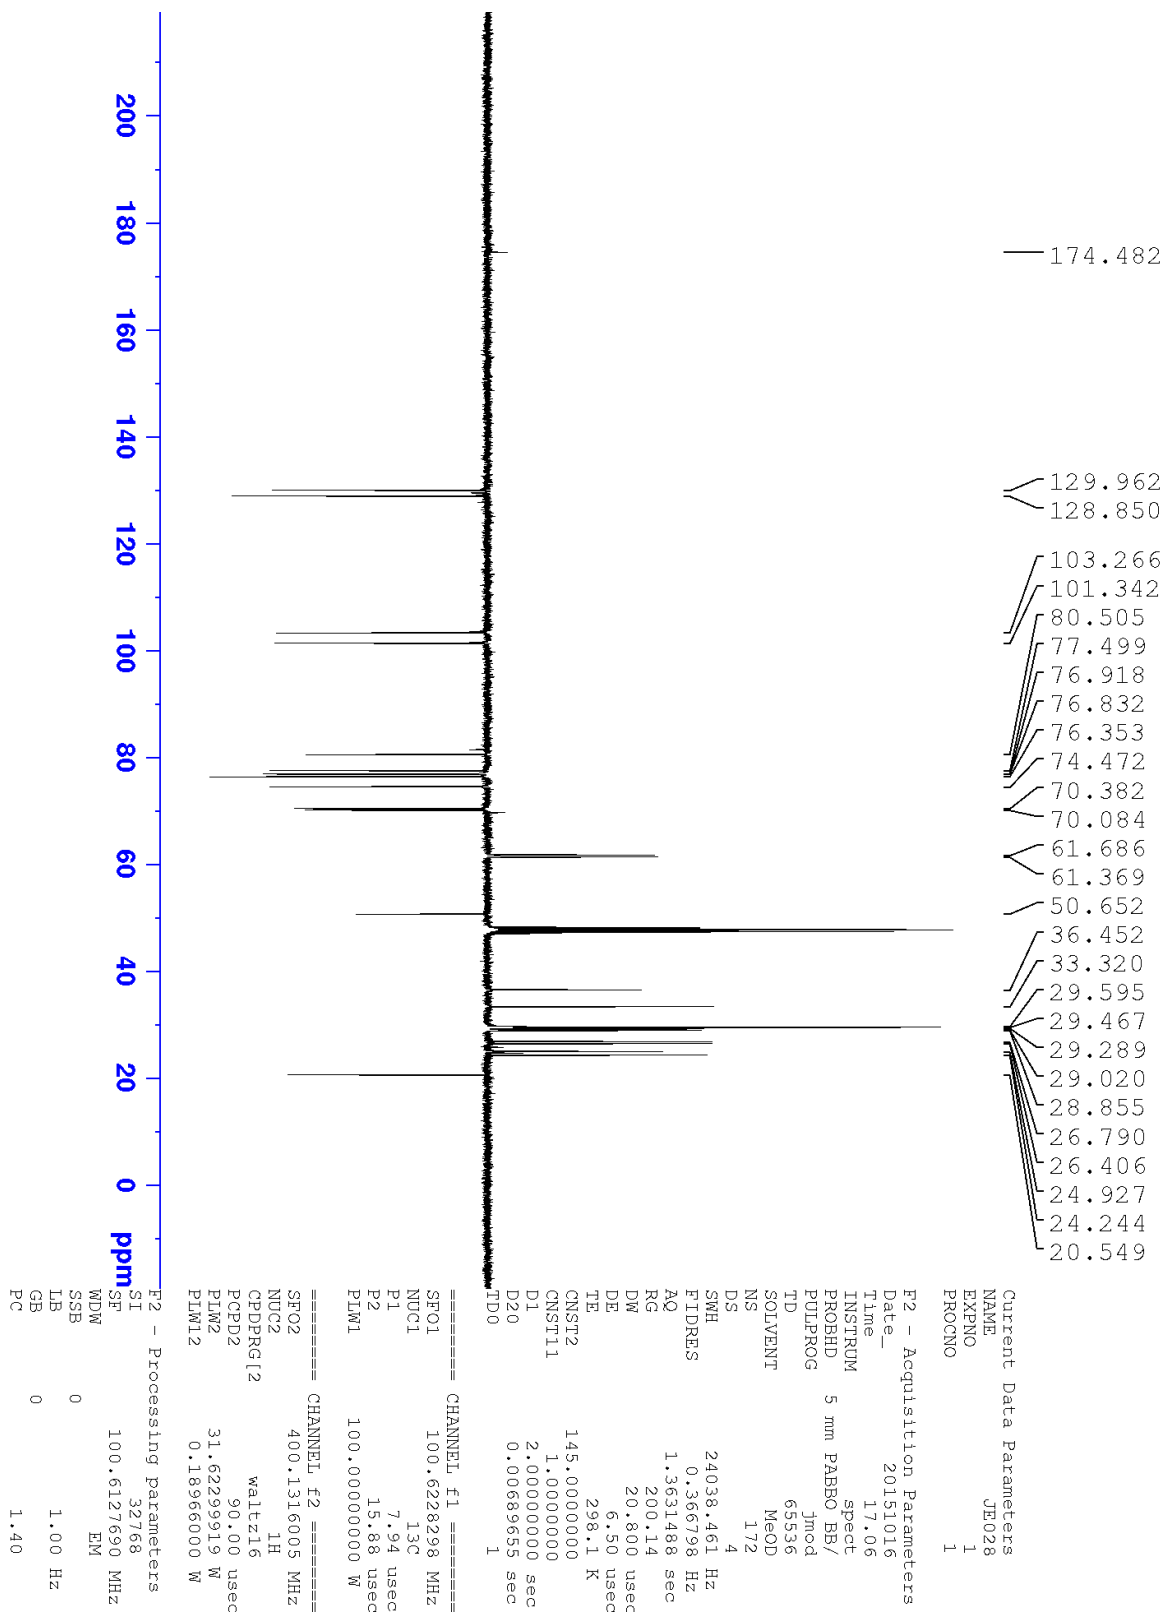

Fig. S8. <sup>13</sup>C-NMR spectrum for compound 8

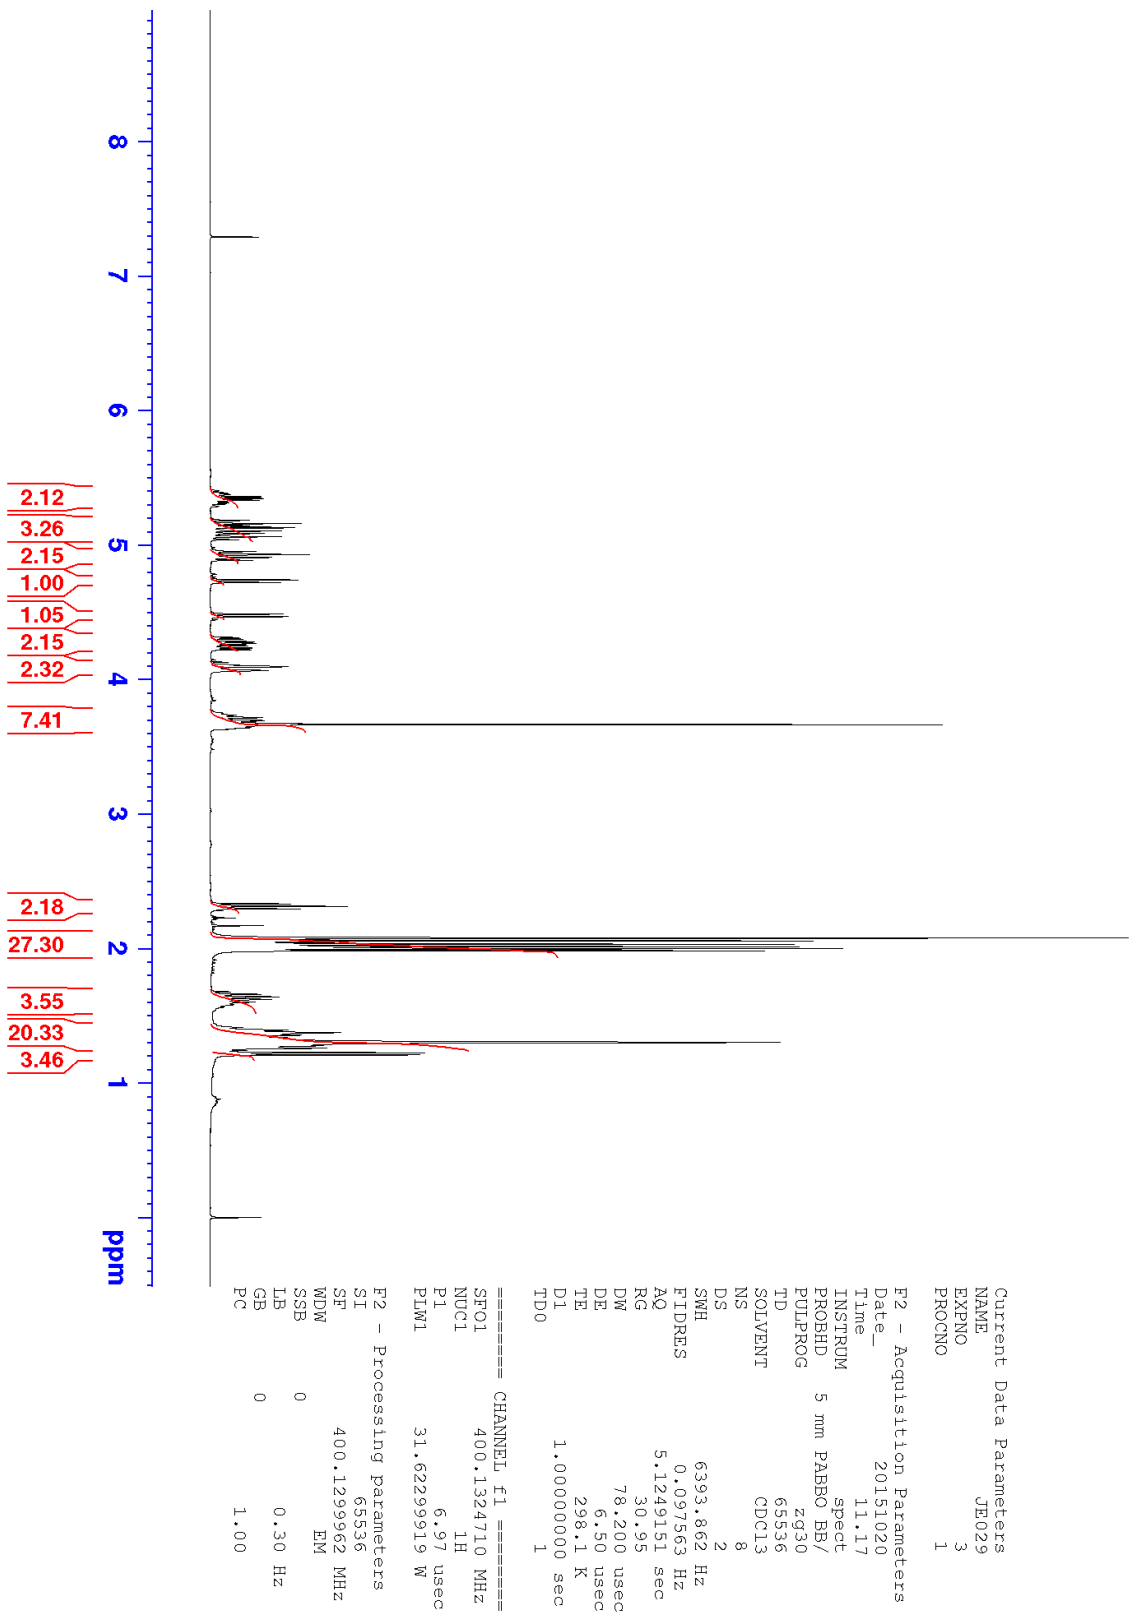

Fig. S9. <sup>1</sup>H-NMR spectrum for compound 9

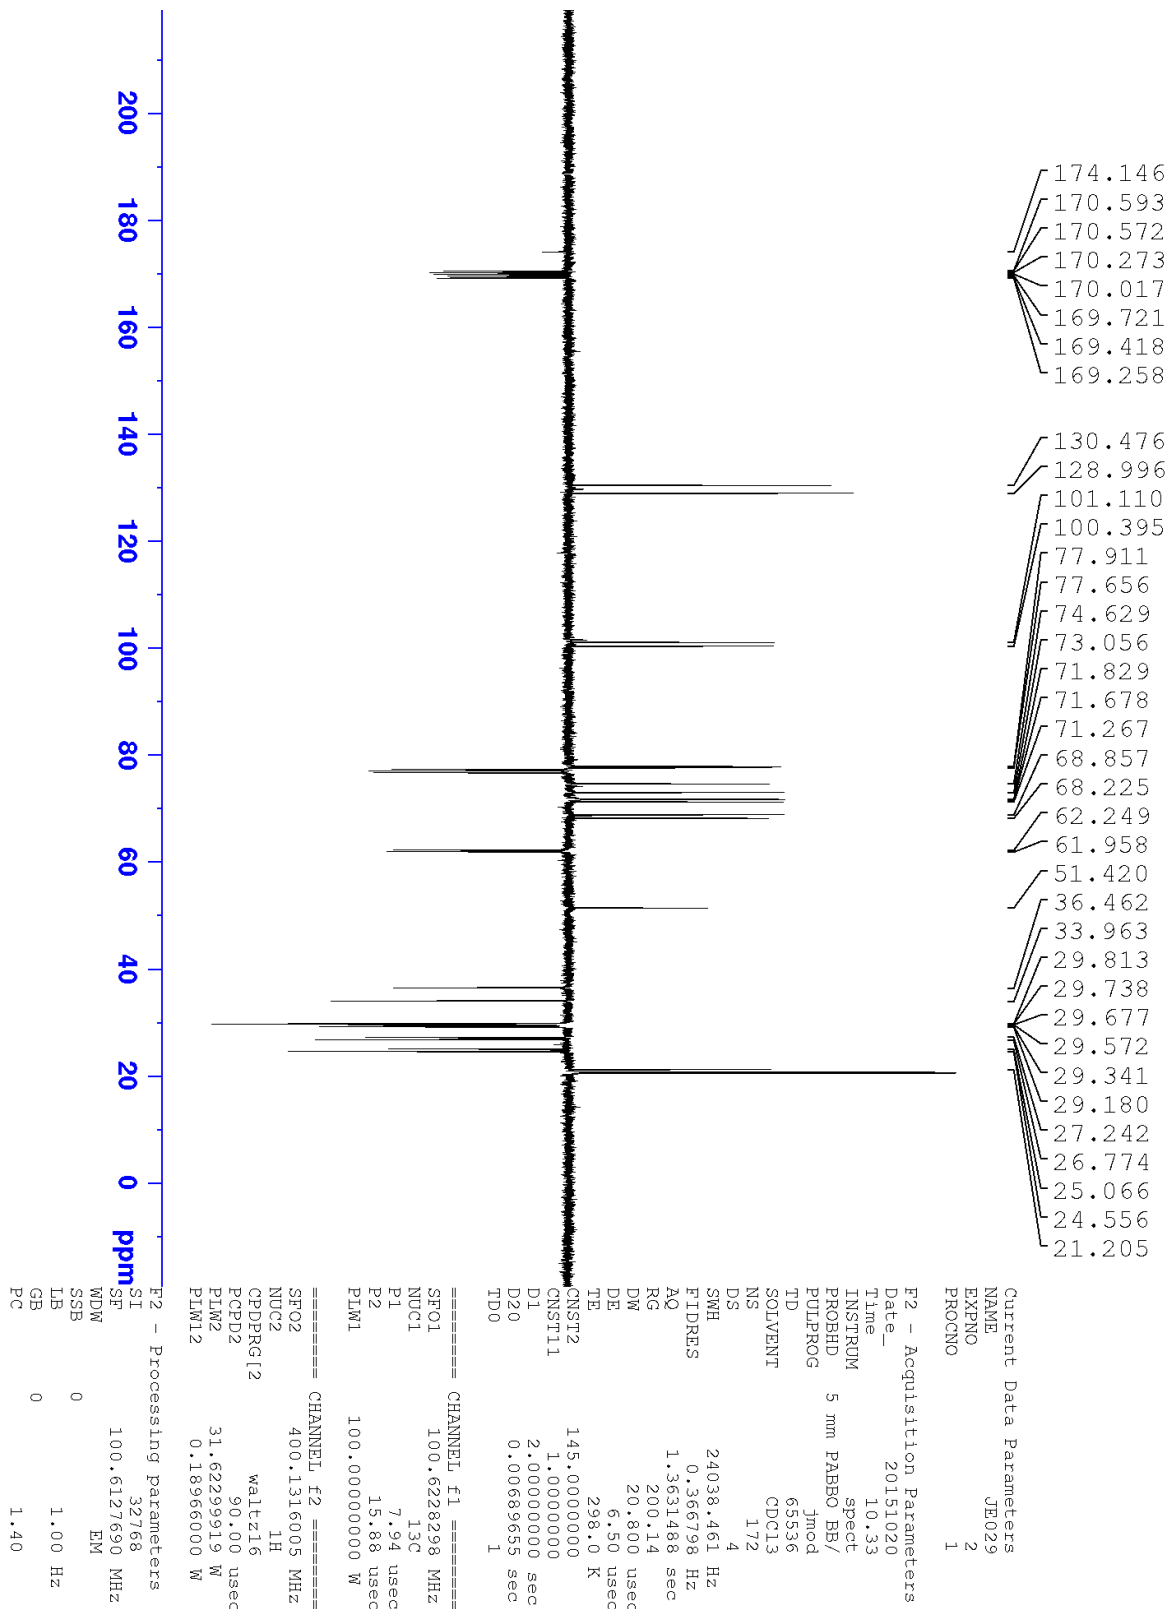

Fig. S10. <sup>13</sup>C-NMR spectrum for compound **9**

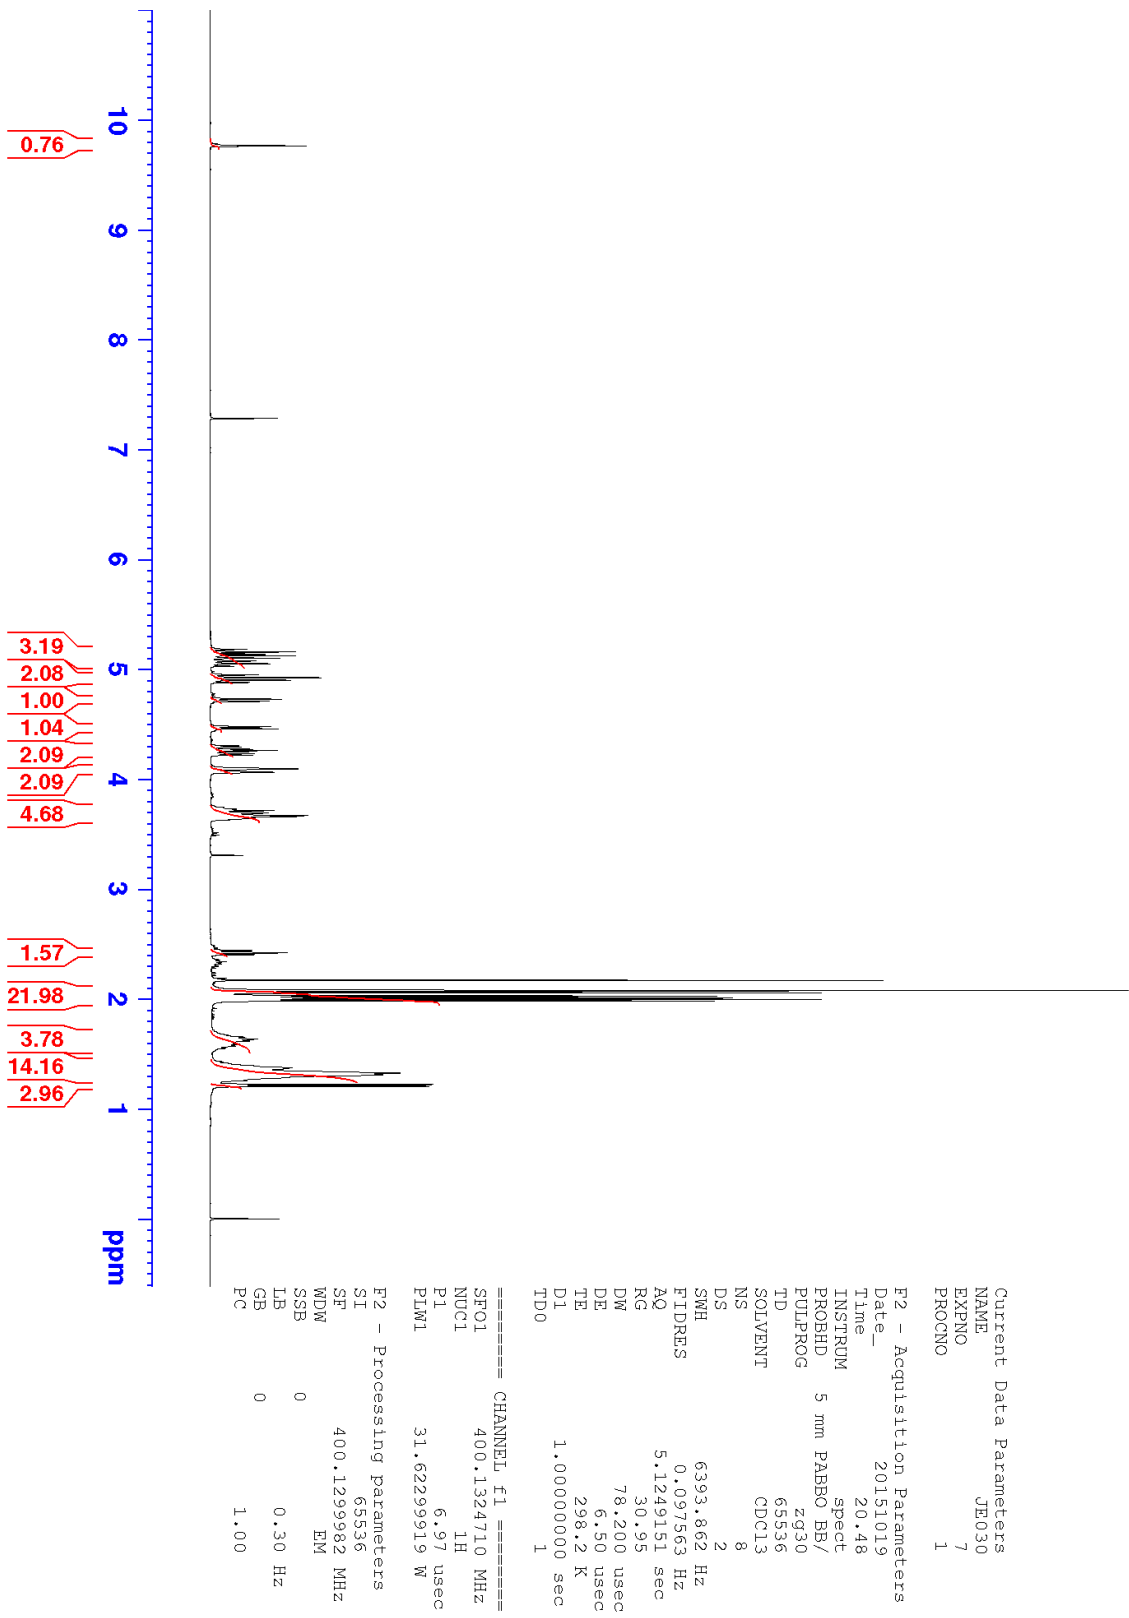

Fig. S11. <sup>1</sup>H-NMR spectrum for compound 4

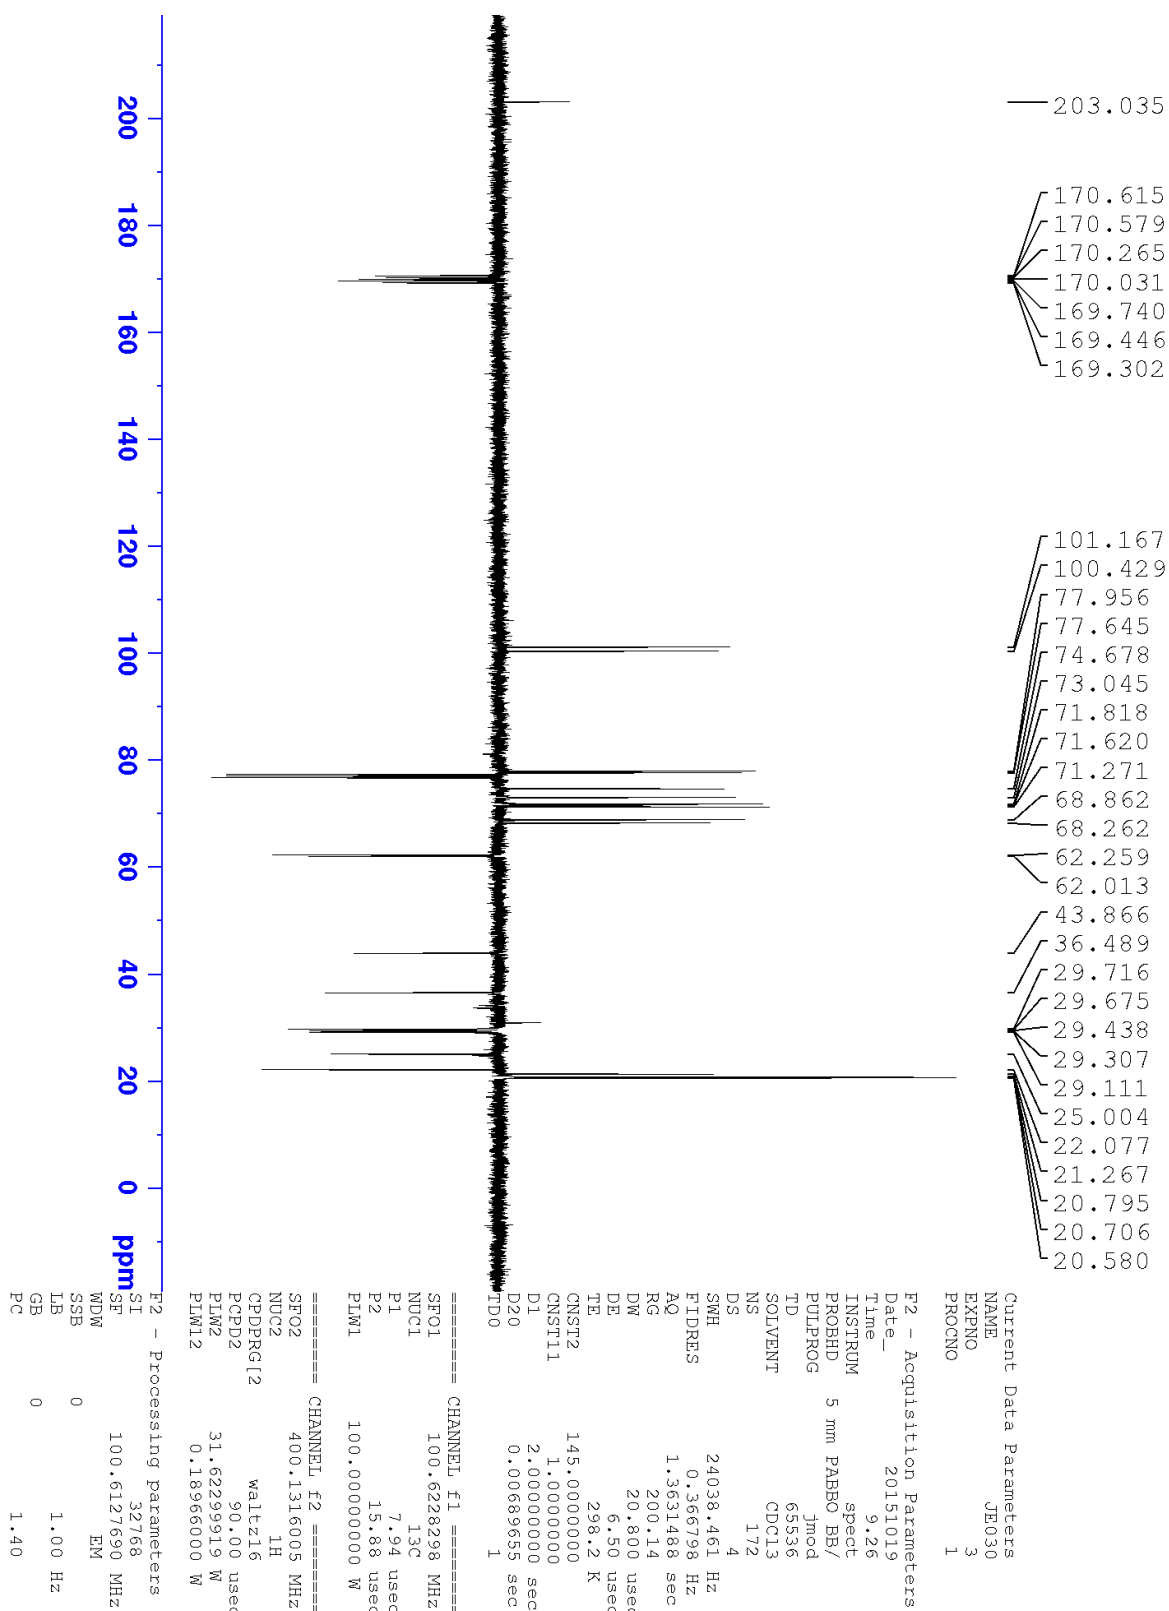

**Fig. S12.** <sup>13</sup>C-NMR spectrum for compound **4**
